# Supplementary material
Source: HighWire-hosted journal article supplement (https://jnm.snmjournals.org/highwire/filestream/94765/field_highwire_adjunct_files/0/159822_Suppemental_Data.pdf)
Supplement: 159822_Suppemental_Data.pdf [file 159822_Suppemental_Data.pdf]

**Supplemental Table 1. Characteristics of patients classified as Parkinson's disease by PET and/or final clinical diagnosis.**

| <b>Age</b> | <b>Sex</b> | <b>Final clinical Dx</b> | <b>PET classification</b> | <b>Clinical characteristics</b>                                                    |
|------------|------------|--------------------------|---------------------------|------------------------------------------------------------------------------------|
| 41         | M          | PD                       | PD                        | early-onset PD; equivalence type; response to high-dose agonist therapy            |
| 45         | M          | PD                       | PD                        | early-onset PD; akinetic-rigid type; response to high-dose agonist therapy         |
| 57         | M          | PD                       | PD                        | akinetic-rigid type; comorbid gait disorder due to cerebral microangiopathy        |
| 47         | M          | PD                       | PD                        | early-onset PD; akinetic-rigid type; response to high-dose levodopa therapy (pump) |
| 66         | F          | PD                       | PD                        | tremor-dominant type; action and postural tremor without dopaminergic response     |
| 61         | M          | PD                       | PD                        | akinetic-rigid type; comorbid gait disorder due to polyneuropathy                  |
| 74         | F          | PD                       | PD                        | equivalence-rigid type; comorbid gait disorder due to cerebral microangiopathy     |
| 75         | M          | PD                       | PD                        | equivalence-rigid type; comorbid gait disorder due to cerebral microangiopathy     |
| 55         | M          | PD                       | PD                        | akinetic-rigid type; response to high-dose agonist/levodopa therapy                |
| 47         | F          | PD                       | PD                        | akinetic-rigid type; response to high-dose agonist therapy                         |
| 47         | F          | PD                       | PD                        | tremor-dominant type; response to deep brain stimulation of subthalamic nucleus    |
| 46         | M          | PD                       | PD                        | equivalence type; response to high-dose agonist therapy                            |
| 79         | F          | PD                       | PD                        | akinetic-rigid type; comorbid gait disorder due to polyneuropathy                  |
| 42         | F          | PD                       | PD                        | early-onset PD; equivalence type; response to high-dose agonist therapy            |
| 55         | M          | PD                       | PD                        | akinetic-rigid type; response to high-dose agonist/levodopa therapy                |

|    |   |         |         |                                                                                                                                                  |
|----|---|---------|---------|--------------------------------------------------------------------------------------------------------------------------------------------------|
| 42 | M | PD      | PD      | early-onset PD; tremor-dominant type; response to deep brain stimulation of subthalamic nucleus                                                  |
| 78 | F | PD      | PD      | akinetic-rigid type; comorbid gait disorder due to polyneuropathy and cerebral microangiopathy                                                   |
| 81 | F | PD      | PD      | equivalence type; comorbid gait disorder due to cerebral microangiopathy; degenerative spinal disease                                            |
| 70 | F | PD      | MSA     | akinetic-rigid type; initially excellent response to levodopa; at later stages, rapid progression; no treatment response; gait disorder; stridor |
| 78 | M | PD      | PDD/DLB | akinetic-rigid type; mini mental state examination, 30/30; moderate response to levodopa therapy                                                 |
| 81 | M | PD      | PDD/DLB | equivalence type; comorbid gait disorder; mini mental state examination, 20/30                                                                   |
| 68 | M | PD      | PDD/DLB | akinetic-rigid type; no response to levodopa therapy                                                                                             |
| 72 | F | PD      | PDD/DLB | akinetic-rigid type; visual hallucinations; mini mental state examination, 26/30                                                                 |
| 75 | M | PSP     | PD      | akinetic-rigid type; gait disorder with frequent falls; early dysarthria and dysphagia; no response to levodopa therapy                          |
| 79 | F | MSA     | PD      | akinetic-rigid type; dysarthria and dysphagia; urinary incontinence; gait disorder; lesion of the first motor neuron; no response to levodopa    |
| 73 | F | PDD/DLB | PD      | equivalence type; visual hallucinations; moderate response to levodopa therapy; vertical gait palsy                                              |
| 57 | M | PDD/DLB | PD      | tremor-dominant type; neuropsychological assessment indicated severe deficits of visuospatial function and episodic memory                       |
| 65 | F | PSP     | PD      | akinetic-rigid type, no response to levodopa treatment                                                                                           |
| 58 | M | MSA     | PD      | cerebellar ataxia syndrome; lesion of the first motor neuron (positive Babinski sign); urge incontinence; no response to levodopa therapy        |
| 75 | F | MSA     | PD      | akinetic-rigid type; early gait disorder with frequent falls; urinary incontinence; syncope; no response to levodopa                             |
